# Supplementary material
Source: PubMed Central journal article supplement (PMC6768316)
Supplement: ehp3909.s001.acco.pdf [file ehp3909.s001.acco.pdf]

**Note to readers with disabilities:** *EHP* strives to ensure that all journal content is accessible to all readers. However, some figures and Supplemental Material published in *EHP* articles may not conform to [508 standards](#) due to the complexity of the information being presented. If you need assistance accessing journal content, please contact [ehp508@niehs.nih.gov](mailto:ehp508@niehs.nih.gov). Our staff will work with you to assess and meet your accessibility needs within 3 working days.

### **Supplemental Material**

#### **Impact of Long-Term Exposure to Wind Turbine Noise on Redemption of Sleep Medication and Antidepressants: A Nationwide Cohort Study**

Aslak Harbo Poulsen, Ole Raaschou-Nielsen, Alfredo Peña, Andrea N. Hahmann, Rikke Baastrup Nordsborg, Matthias Ketzel, Jørgen Brandt, and Mette Sørensen

#### **Table of Contents**

**Table S1.** Characteristics of the populations for study of redemption of sleep medication and antidepressants, respectively, at start of follow-up according to residential low frequency exposure to indoor wind turbine noise calculated as mean exposure during the preceding year.

**Table S2.** Characteristics of the populations for study of redemption of sleep medication and antidepressants, respectively, at start of follow-up, according to residential exposure to outdoor and indoor low frequency wind turbine noise calculated as mean exposure during the preceding year.

**Table S3.** Pearson correlation coefficients between different noise metrics above the reference level (24 dB outdoor WTN and 5 dB indoor LF WTN) preceding entry into the study population.

**Table S4.** Associations between 5-year exposure to outdoor wind turbine noise and redemption of sleep medication and antidepressants in different sub-populations.

**Table S5.** Associations between 5-year exposure to indoor low frequency wind turbine noise and redemption of sleep medication and antidepressants in different sub-populations.

**Supplement Table 1** Characteristics of the populations for study of redemption of sleep medication and antidepressants, respectively, at start of follow-up according to residential low frequency exposure to indoor wind turbine noise calculated as mean exposure during the preceding year

| Characteristics at entry                  | Indoor low frequency wind turbine noise                       |                                                            |                                                       |
|-------------------------------------------|---------------------------------------------------------------|------------------------------------------------------------|-------------------------------------------------------|
|                                           | < 10 dB<br>Sleep / antidepressants<br>(N = 579,821 / 580,838) | 10-15 dB<br>Sleep / antidepressants<br>(N = 3,840 / 3,757) | ≥ 15 dB<br>Sleep / antidepressants<br>(N = 307 / 296) |
| <i>Men</i>                                | 52 / 52 %                                                     | 54 / 54 %                                                  | 50 / 52 %                                             |
| <i>Age</i>                                |                                                               |                                                            |                                                       |
| < 40 years                                | 45 / 43 %                                                     | 63 / 62 %                                                  | 60 / 59 %                                             |
| 40-50 years                               | 19 / 19 %                                                     | 18 / 18 %                                                  | 18 / 17 %                                             |
| 50-60 years                               | 16 / 16 %                                                     | 11 / 11 %                                                  | 11 / 12 %                                             |
| ≥ 60 years                                | 21 / 22 %                                                     | 8 / 9 %                                                    | 10 / 11 %                                             |
| <i>Year of entry</i>                      |                                                               |                                                            |                                                       |
| 1996-2000                                 | 55 / 57 %                                                     | 24 / 26 %                                                  | 38 / 39 %                                             |
| 2001-2005                                 | 14 / 14 %                                                     | 27 / 28 %                                                  | 18 / 16 %                                             |
| 2006-2010                                 | 20 / 20 %                                                     | 30 / 30 %                                                  | 27 / 29 %                                             |
| 2011-2013                                 | 10 / 9 %                                                      | 18 / 17 %                                                  | 17 / 16 %                                             |
| <i>Personal income</i>                    |                                                               |                                                            |                                                       |
| Quartile 1 (low)                          | 20 / 20 %                                                     | 19 / 19 %                                                  | 17 / 19 %                                             |
| Quartile 2                                | 24 / 23 %                                                     | 26 / 25 %                                                  | 26 / 26 %                                             |
| Quartile 3                                | 26 / 26 %                                                     | 27 / 27 %                                                  | 27 / 26 %                                             |
| Quartile 4 (high)                         | 25 / 25 %                                                     | 21 / 23 %                                                  | 23 / 23 %                                             |
| Unknown                                   | 6 / 6 %                                                       | 6 / 6 %                                                    | 6 / 6 %                                               |
| <i>Highest attained education</i>         |                                                               |                                                            |                                                       |
| Basic or high school                      | 35 / 35 %                                                     | 30 / 30 %                                                  | 31 / 31 %                                             |
| Vocational                                | 43 / 42 %                                                     | 51 / 51 %                                                  | 48 / 49 %                                             |
| High                                      | 16 / 16 %                                                     | 16 / 17 %                                                  | 17 / 16 %                                             |
| Unknown                                   | 6 / 7 %                                                       | 2 / 2 %                                                    | 5 / 4 %                                               |
| <i>Marital status</i>                     |                                                               |                                                            |                                                       |
| Married                                   | 55 / 56 %                                                     | 42 / 42 %                                                  | 52 / 52 %                                             |
| Divorced/widow(er)                        | 14 / 14 %                                                     | 12 / 12 %                                                  | 11 / 11 %                                             |
| Never married                             | 31 / 30 %                                                     | 47 / 46 %                                                  | 37 / 37 %                                             |
| <i>Attachment to labor market</i>         |                                                               |                                                            |                                                       |
| Working                                   | 69 / 69 %                                                     | 79 / 80 %                                                  | 80 / 80 %                                             |
| Retired                                   | 18 / 19 %                                                     | 7 / 7 %                                                    | 8 / 9 %                                               |
| Other                                     | 13 / 13 %                                                     | 13 / 13 %                                                  | 11 / 11 %                                             |
| <i>Area-level income<sup>a</sup></i>      |                                                               |                                                            |                                                       |
| Quartile 1 (low)                          | 23 / 23 %                                                     | 10 / 10 %                                                  | 11 / 10 %                                             |
| Quartile 2                                | 28 / 28 %                                                     | 28 / 27 %                                                  | 30 / 30 %                                             |
| Quartile 3                                | 28 / 28 %                                                     | 34 / 34 %                                                  | 35 / 35 %                                             |
| Quartile 4 (high)                         | 19 / 19 %                                                     | 21 / 22 %                                                  | 18 / 18 %                                             |
| Unknown                                   | 2 / 2 %                                                       | 7 / 7 %                                                    | 7 / 7 %                                               |
| <i>Type of dwelling</i>                   |                                                               |                                                            |                                                       |
| Farm                                      | 14 / 14 %                                                     | 43 / 43 %                                                  | 46 / 46 %                                             |
| Single-family detached house              | 62 / 62 %                                                     | 52 / 51 %                                                  | 48 / 47 %                                             |
| Others                                    | 24 / 24 %                                                     | 5 / 6 %                                                    | 6 / 7 %                                               |
| <i>Distance to major road<sup>b</sup></i> |                                                               |                                                            |                                                       |
| < 500 m                                   | 35 / 35 %                                                     | 15 / 15 %                                                  | 14 / 13 %                                             |
| 500-2,000 m                               | 27 / 27 %                                                     | 23 / 24 %                                                  | 19 / 19 %                                             |

|                                                                                  |           |           |           |
|----------------------------------------------------------------------------------|-----------|-----------|-----------|
| $\geq 2,000$ m                                                                   | 37 / 37 % | 62 / 61 % | 67 / 68 % |
| <i>Traffic load within 500 m (<math>10^3</math> vehicle km/day) <sup>c</sup></i> |           |           |           |
| < 2.5                                                                            | 34 / 34 % | 70 / 70 % | 80 / 80 % |
| 2.5-5.3                                                                          | 25 / 25 % | 14 / 14 % | 5 / 5 %   |
| 5.3-9.7                                                                          | 19 / 19 % | 11 / 11 % | 9 / 9 %   |
| > 9.7                                                                            | 22 / 22 % | 5 / 5 %   | 5 / 5 %   |
| <i>Tree coverage <sup>c</sup></i>                                                |           |           |           |
| < 5%                                                                             | 13 / 13 % | 33 / 33 % | 38 / 38 % |
| 5-20 %                                                                           | 63 / 63 % | 60 / 60 % | 53 / 53 % |
| > 20 %                                                                           | 24 / 24 % | 7 / 7 %   | 8 / 8 %   |

---

<sup>a</sup> Average disposable household income among all households in a 100\*100 m grid cell

<sup>b</sup> Major road defined as  $\geq 5,000$  vehicles per day

<sup>c</sup> In a 500 meters radius around the dwelling

**Supplement Table 2** Characteristics of the populations for study of redemption of sleep medication and antidepressants, respectively, at start of follow-up, according to residential exposure to outdoor and indoor low frequency wind turbine noise calculated as mean exposure during the preceding year

|                                                   | Outdoor wind turbine noise                                          |                                                                  |                                                                 | Indoor LF wind turbine noise                                        |                                                                  |                                                             |
|---------------------------------------------------|---------------------------------------------------------------------|------------------------------------------------------------------|-----------------------------------------------------------------|---------------------------------------------------------------------|------------------------------------------------------------------|-------------------------------------------------------------|
|                                                   | < 36 dB<br>Sleep /<br>antidepressants<br>(N = 575,899 /<br>576,857) | 36-42 dB<br>Sleep /<br>antidepressants<br>(N = 6,704 /<br>6,637) | ≥ 42 dB<br>Sleep /<br>antidepressants<br>(N = 1,365 /<br>1,397) | < 10 dB<br>Sleep /<br>antidepressants<br>(N = 579,821 /<br>580,838) | 10-15 dB<br>Sleep /<br>antidepressants<br>(N = 3,840 /<br>3,757) | ≥ 15 dB<br>Sleep /<br>antidepressants<br>(N = 307 /<br>296) |
| <i>Outdoor wind turbine noise (1-year mean)</i>   |                                                                     |                                                                  |                                                                 |                                                                     |                                                                  |                                                             |
| < 24 dB                                           | 78 / 79 %                                                           | -                                                                | -                                                               | 78 / 78 %                                                           | -                                                                | -                                                           |
| 24-30 dB                                          | 16 / 15 %                                                           | -                                                                | -                                                               | 16 / 15 %                                                           | 1 / 1 %                                                          | -                                                           |
| 30-36 dB                                          | 6 / 5 %                                                             | -                                                                | -                                                               | 5 / 5 %                                                             | 45 / 45 %                                                        | 2 / 2 %                                                     |
| 36-42 dB                                          | -                                                                   | 100 %                                                            | -                                                               | 1 / 1 %                                                             | 38 / 38 %                                                        | 48 / 47 %                                                   |
| ≥ 42 dB                                           | -                                                                   | -                                                                | 100 %                                                           | 0 / 0 %                                                             | 16 / 17 %                                                        | 50 / 51 %                                                   |
| <i>Indoor LF wind turbine noise (1-year mean)</i> |                                                                     |                                                                  |                                                                 |                                                                     |                                                                  |                                                             |
| < 5 dB                                            | 97 / 97 %                                                           | 27 / 28 %                                                        | 7 / 7 %                                                         | 97 / 97 %                                                           | -                                                                | -                                                           |
| 5-10 dB                                           | 3 / 2 %                                                             | 48 / 49 %                                                        | 38 / 37 %                                                       | 3 / 3 %                                                             | -                                                                | -                                                           |
| 10-15 dB                                          | 0 / 0 %                                                             | 22 / 21 %                                                        | 44 / 45 %                                                       | -                                                                   | 100 / 100 %                                                      | -                                                           |
| ≥ 15 dB                                           | 0 / 0 %                                                             | 2 / 2 %                                                          | 11 / 11 %                                                       | -                                                                   | -                                                                | 100 / 100 %                                                 |
| <i>Distance to nearest wind turbine</i>           |                                                                     |                                                                  |                                                                 |                                                                     |                                                                  |                                                             |
| < 500 m                                           | 8 / 7 %                                                             | 94 / 94 %                                                        | 97 / 97%                                                        | 8 / 8 %                                                             | 67 / 67 %                                                        | 93 / 93 %                                                   |
| 500-1,000 m                                       | 22 / 22 %                                                           | 5 / 4 %                                                          | 1 / 1 %                                                         | 22 / 22 %                                                           | 32 / 31 %                                                        | 5 / 5 %                                                     |
| 1,000-2,000m                                      | 34 / 34 %                                                           | 1 / 1 %                                                          | 1 / 1 %                                                         | 34 / 34 %                                                           | 1 / 1 %                                                          | 1 / 1 %                                                     |
| ≥ 2,000 m                                         | 36 / 37 %                                                           | 1 / 1 %                                                          | 1 / 2 %                                                         | 36 / 36 %                                                           | 1 / 1 %                                                          | 1 / 1 %                                                     |
| <i>Total height, nearest wind turbine</i>         |                                                                     |                                                                  |                                                                 |                                                                     |                                                                  |                                                             |
| < 35 m                                            | 31 / 31 %                                                           | 32 / 33 %                                                        | 65 / 66 %                                                       | 31 / 32 %                                                           | 12 / 13 %                                                        | 19 / 20 %                                                   |
| 35-70 m                                           | 56 / 56 %                                                           | 58 / 58 %                                                        | 33 / 33 %                                                       | 56 / 56 %                                                           | 57 / 57 %                                                        | 62 / 61 %                                                   |
| 70-100 m                                          | 11 / 10 %                                                           | 9 / 8 %                                                          | 1 / 1 %                                                         | 11 / 10 %                                                           | 28 / 27 %                                                        | 17 / 18 %                                                   |
| ≥ 100 m                                           | 2 / 1 %                                                             | 1 / 1 %                                                          | 0 / 0 %                                                         | 1 / 1 %                                                             | 3 / 3 %                                                          | 2 / 2 %                                                     |

LF: low frequency

**Supplement Table 3** Pearson correlation coefficients between different noise metrics above the reference level (24 dB outdoor WTN and 5 dB indoor LF WTN) preceding entry into the study population

|                        | Outdoor WTN<br>1-y mean | Outdoor WTN<br>5-y mean | Indoor LF WTN<br>1-y mean | Indoor LF WTN<br>5-y mean |
|------------------------|-------------------------|-------------------------|---------------------------|---------------------------|
| Outdoor WTN 1-y mean   | 1                       | 0.78                    | 0.63                      | 0.60                      |
| Outdoor WTN 5-y mean   |                         | 1                       | 0.36                      | 0.71                      |
| Indoor LF WTN 1-y mean |                         |                         | 1                         | 0.79                      |
| Indoor LF WTN 5-y mean |                         |                         |                           | 1                         |

WTN = wind turbine noise; LF = low frequency; y = year

**Supplement Table 4** Associations between 5-year exposure to outdoor wind turbine noise and redemption of sleep medication and antidepressants in different sub-populations

| Sub-populations                                   | Exposure categories | Sleep medication |                                    | Antidepressants |                                    |
|---------------------------------------------------|---------------------|------------------|------------------------------------|-----------------|------------------------------------|
|                                                   |                     | N cases          | Adjusted HR (95 % CI) <sup>a</sup> | N cases         | Adjusted HR (95 % CI) <sup>a</sup> |
| <i>All<sup>b</sup></i>                            |                     |                  |                                    |                 |                                    |
|                                                   | < 24 dB             | 50,559           | 1 (ref)                            | 60,315          | 1 (ref)                            |
|                                                   | 24-30 dB            | 13,021           | 1.03 (1.01-1.05)                   | 15,958          | 1.02 (1.00-1.04)                   |
|                                                   | 30-36 dB            | 4,133            | 1.03 (1.00-1.06)                   | 5,016           | 1.02 (0.99-1.05)                   |
|                                                   | 36-42 dB            | 814              | 1.08 (1.00-1.15)                   | 899             | 1.01 (0.95-1.08)                   |
|                                                   | ≥ 42 dB             | 169              | 1.14 (0.98-1.33)                   | 185             | 1.17 (1.01-1.35)                   |
| <i>First redemption after 2005</i>                |                     |                  |                                    |                 |                                    |
|                                                   | < 24 dB             | 22,465           | 1 (ref)                            | 31,191          | 1 (ref)                            |
|                                                   | 24-30 dB            | 6,510            | 1.03 (1.00-1.05)                   | 9,128           | 1.03 (1.01-1.06)                   |
|                                                   | 30-36 dB            | 2,031            | 1.03 (0.98-1.07)                   | 2,818           | 1.02 (0.98-1.06)                   |
|                                                   | 36-42 dB            | 331              | 1.03 (0.93-1.15)                   | 452             | 1.04 (0.94-1.14)                   |
|                                                   | ≥ 42 dB             | 48               | 1.24 (0.93-1.64)                   | 61              | 1.21 (0.94-1.56)                   |
| <i>Living on a farm</i>                           |                     |                  |                                    |                 |                                    |
|                                                   | < 24 dB             | 4,932            | 1 (ref)                            | 5,548           | 1 (ref)                            |
|                                                   | 24-30 dB            | 2,025            | 0.95 (0.90-1.00)                   | 2,453           | 0.96 (0.92-1.01)                   |
|                                                   | 30-36 dB            | 1,105            | 1.00 (0.94-1.07)                   | 1,273           | 0.95 (0.90-1.01)                   |
|                                                   | 36-42 dB            | 344              | 1.10 (0.98-1.22)                   | 335             | 0.92 (0.82-1.02)                   |
|                                                   | ≥ 42 dB             | 57               | 1.04 (0.80-1.35)                   | 53              | 0.91 (0.70-1.20)                   |
| <i>Nearest wind turbine ≥ 35 m (total height)</i> |                     |                  |                                    |                 |                                    |
|                                                   | < 24 dB             | 38,379           | 1 (ref)                            | 46,487          | 1 (ref)                            |
|                                                   | 24-30 dB            | 11,062           | 1.02 (1.00-1.05)                   | 13,804          | 1.02 (1.00-1.04)                   |
|                                                   | 30-36 dB            | 3,471            | 1.04 (1.00-1.07)                   | 4,225           | 1.01 (0.98-1.04)                   |

|                                                          |        |                  |        |                  |
|----------------------------------------------------------|--------|------------------|--------|------------------|
| 36-42 dB                                                 | 600    | 1.06 (0.98-1.15) | 707    | 1.04 (0.96-1.12) |
| ≥ 42 dB                                                  | 80     | 1.25 (1.00-1.55) | 84     | 1.15 (0.93-1.43) |
| <i>High validity score of noise estimate<sup>c</sup></i> |        |                  |        |                  |
| < 24 dB                                                  | 37,811 | 1 (ref)          | 45,734 | 1 (ref)          |
| 24-30 dB                                                 | 8,227  | 1.04 (1.02-1.07) | 10,524 | 1.03 (1.01-1.05) |
| 30-36 dB                                                 | 2,536  | 1.03 (0.98-1.07) | 3,275  | 1.02 (0.98-1.06) |
| 36-42 dB                                                 | 402    | 1.11 (1.01-1.23) | 472    | 1.03 (0.94-1.13) |
| ≥ 42 dB                                                  | 19     | 0.81 (0.52-1.27) | 34     | 1.25 (0.89-1.74) |
| <i>Dwelling ≥ 2,000 m from major road<sup>d</sup></i>    |        |                  |        |                  |
| < 24 dB                                                  | 16,218 | 1 (ref)          | 19,395 | 1 (ref)          |
| 24-30 dB                                                 | 6,078  | 1.02 (0.99-1.05) | 7,517  | 1.01 (0.98-1.04) |
| 30-36 dB                                                 | 2,212  | 0.99 (0.95-1.04) | 2,737  | 0.99 (0.95-1.03) |
| 36-42 dB                                                 | 434    | 0.98 (0.89-1.08) | 491    | 0.94 (0.86-1.02) |
| ≥ 42 dB                                                  | 98     | 1.13 (0.93-1.38) | 117    | 1.27 (1.06-1.52) |
| <i>Less than 5 % tree coverage<sup>e</sup></i>           |        |                  |        |                  |
| < 24 dB                                                  | 5,350  | 1 (ref)          | 6137   | 1 (ref)          |
| 24-30 dB                                                 | 2,205  | 1.01 (0.96-1.06) | 2710   | 1.02 (0.98-1.07) |
| 30-36 dB                                                 | 911    | 0.97 (0.90-1.04) | 1121   | 0.99 (0.93-1.05) |
| 36-42 dB                                                 | 227    | 1.02 (0.89-1.16) | 262    | 1.00 (0.89-1.13) |
| ≥ 42 dB                                                  | 41     | 0.98 (0.72-1.33) | 43     | 0.97 (0.72-1.30) |

---

HR: hazard ratio; CI: confidence interval

<sup>a</sup> Adjusted for age, sex, calendar-year, personal income, education, marital status, work-marked affiliation, area-level socioeconomic status, type of dwelling, traffic load in 500 m radius and distance to major road.

<sup>b</sup> Corresponding to HRs and CIs in Table 2

<sup>c</sup> Includes only situations with validity score better than the median among those with exposures ≥ 10 dB. The validity score reflects the estimated uncertainty associated with all aspects of noise estimation at a specific address and day.

<sup>d</sup> Major road defined as ≥ 5,000 vehicles per day

<sup>e</sup> In a 500 meters radius around the dwelling

**Supplement Table 5** Associations between 5-year exposure to indoor low frequency wind turbine noise and redemption of sleep medication and antidepressants in different sub-populations

| Sub-populations                                   | Exposure categories | Sleep medication |                                    | Antidepressants |                                    |
|---------------------------------------------------|---------------------|------------------|------------------------------------|-----------------|------------------------------------|
|                                                   |                     | N cases          | Adjusted HR (95 % CI) <sup>a</sup> | N cases         | Adjusted HR (95 % CI) <sup>a</sup> |
| <i>All<sup>b</sup></i>                            |                     |                  |                                    |                 |                                    |
|                                                   | < 5 dB              | 65,202           | 1 (ref)                            | 77,995          | 1 (ref)                            |
|                                                   | 5-10 dB             | 2,911            | 1.05 (1.01-1.09)                   | 3,663           | 1.04 (1.00-1.07)                   |
|                                                   | 10-15 dB            | 542              | 1.04 (0.96-1.14)                   | 672             | 1.01 (0.94-1.10)                   |
|                                                   | ≥ 15 dB             | 41               | 1.03 (0.76-1.40)                   | 43              | 0.94 (0.70-1.27)                   |
| <i>First redemption after 2005</i>                |                     |                  |                                    |                 |                                    |
|                                                   | < 5 dB              | 29,225           | 1 (ref)                            | 40,689          | 1 (ref)                            |
|                                                   | 5-10 dB             | 1,786            | 1.05 (1.00-1.10)                   | 2,457           | 1.04 (1.00-1.08)                   |
|                                                   | 10-15 dB            | 343              | 0.99 (0.89-1.10)                   | 471             | 0.99 (0.90-1.09)                   |
|                                                   | ≥ 15 dB             | 31               | 1.35 (0.95-1.91)                   | 33              | 1.12 (0.79-1.57)                   |
| <i>Living on a farm</i>                           |                     |                  |                                    |                 |                                    |
|                                                   | < 5 dB              | 7262             | 1 (ref)                            | 8,250           | 1 (ref)                            |
|                                                   | 5-10 dB             | 935              | 1.02 (0.95-1.09)                   | 1,114           | 0.99 (0.93-1.05)                   |
|                                                   | 10-15 dB            | 248              | 1.05 (0.92-1.19)                   | 278             | 0.94 (0.84-1.06)                   |
|                                                   | ≥ 15 dB             | 18               | 0.92 (0.58-1.47)                   | 20              | 0.85 (0.55-1.31)                   |
| <i>Nearest wind turbine ≥ 35 m (total height)</i> |                     |                  |                                    |                 |                                    |
|                                                   | < 5 dB              | 50,434           | 1 (ref)                            | 61,293          | 1 (ref)                            |
|                                                   | 5-10 dB             | 2,633            | 1.04 (1.00-1.08)                   | 3,357           | 1.03 (1.00-1.07)                   |
|                                                   | 10-15 dB            | 488              | 1.03 (0.94-1.13)                   | 619             | 1.02 (0.94-1.10)                   |
|                                                   | ≥ 15 dB             | 37               | 1.10 (0.79-1.51)                   | 38              | 0.96 (0.70-1.32)                   |

*High validity score of noise estimate<sup>c</sup>*



|                                                       |        |                  |        |                  |
|-------------------------------------------------------|--------|------------------|--------|------------------|
| < 5 dB                                                | 35,572 | 1 (ref)          | 43,189 | 1 (ref)          |
| 5-10 dB                                               | 1,330  | 1.11 (1.05-1.18) | 1,654  | 1.03 (0.98-1.09) |
| 10-15 dB                                              | 217    | 0.90 (0.79-1.03) | 338    | 1.06 (0.95-1.18) |
| ≥ 15 dB                                               | 18     | 1.20 (0.75-1.90) | 17     | 0.92 (0.57-1.49) |
| <i>Dwelling ≥ 2,000 m from major road<sup>d</sup></i> |        |                  |        |                  |
| < 5 dB                                                | 23,096 | 1 (ref)          | 27,843 | 1 (ref)          |
| 5-10 dB                                               | 1,602  | 1.03 (0.98-1.09) | 1,981  | 1.00 (0.95-1.05) |
| 10-15 dB                                              | 310    | 0.95 (0.85-1.06) | 399    | 0.95 (0.86-1.05) |
| ≥ 15 dB                                               | 32     | 1.13 (0.80-1.60) | 34     | 1.03 (0.74-1.44) |
| <i>Less than 5 % tree coverage<sup>e</sup></i>        |        |                  |        |                  |
| < 5 dB                                                | 7,885  | 1 (ref)          | 9,209  | 1 (ref)          |
| 5-10 dB                                               | 666    | 1.00 (0.93-1.09) | 836    | 1.00 (0.93-1.08) |
| 10-15 dB                                              | 166    | 1.00 (0.85-1.16) | 208    | 0.98 (0.85-1.12) |
| ≥ 15 dB                                               | 17     | 1.01 (0.63-1.63) | 20     | 0.97 (0.63-1.51) |

---

HR: hazard ratio; CI: confidence interval

<sup>a</sup> Adjusted for age, sex, calendar-year, personal income, education, marital status, work-marked affiliation, area-level socioeconomic status, type of dwelling, traffic load in 500 m radius and distance to major road.

<sup>b</sup> Corresponding to HRs and CIs in Table 3

<sup>c</sup> Includes only situations with validity score better than the median among those with exposures ≥ 10 dB. The validity score reflects the estimated uncertainty associated with all aspects of noise estimation at a specific address and day.

<sup>d</sup> Major road defined as ≥ 5,000 vehicles per day

<sup>e</sup> In a 500 meters radius around the dwelling
