# Supplementary material
Source: PubMed Central journal article supplement (PMC6768316)
Supplement: ehp3909.smcontents.508.pdf [file ehp3909.smcontents.508.pdf]

**Note to readers with disabilities:** *EHP* strives to ensure that all journal content is accessible to all readers. However, some figures and Supplemental Material published in *EHP* articles may not conform to [508 standards](#) due to the complexity of the information being presented. If you need assistance accessing journal content, please contact [ehp508@niehs.nih.gov](mailto:ehp508@niehs.nih.gov). Our staff will work with you to assess and meet your accessibility needs within 3 working days.

### **Supplemental Material**

#### **Impact of Long-Term Exposure to Wind Turbine Noise on Redemption of Sleep Medication and Antidepressants: A Nationwide Cohort Study**

Aslak Harbo Poulsen, Ole Raaschou-Nielsen, Alfredo Peña, Andrea N. Hahmann, Rikke Baastrup Nordsborg, Matthias Ketzel, Jørgen Brandt, and Mette Sørensen

#### **Table of Contents**

**Table S1.** Characteristics of the populations for study of redemption of sleep medication and antidepressants, respectively, at start of follow-up according to residential low frequency exposure to indoor wind turbine noise calculated as mean exposure during the preceding year.

**Table S2.** Characteristics of the populations for study of redemption of sleep medication and antidepressants, respectively, at start of follow-up, according to residential exposure to outdoor and indoor low frequency wind turbine noise calculated as mean exposure during the preceding year.

**Table S3.** Pearson correlation coefficients between different noise metrics above the reference level (24 dB outdoor WTN and 5 dB indoor LF WTN) preceding entry into the study population.

**Table S4.** Associations between 5-year exposure to outdoor wind turbine noise and redemption of sleep medication and antidepressants in different sub-populations.

**Table S5.** Associations between 5-year exposure to indoor low frequency wind turbine noise and redemption of sleep medication and antidepressants in different sub-populations.
